RESEARCH ARTICLE

# QTL analysis and dissection of panicle components in rice using advanced backcross populations derived from *Oryza Sativa* cultivars HR1128 and 'Nipponbare'

Zhizhong Sun<sup>1,2,3</sup>✉, Xiaoling Yin<sup>4</sup>✉, Jia Ding<sup>2,3</sup>, Dong Yu<sup>1,2,3</sup>, Miao Hu<sup>2</sup>, Xuewu Sun<sup>2,3</sup>, Yanning Tan<sup>2,3</sup>, Xiabing Sheng<sup>2,3</sup>, Ling Liu<sup>4</sup>, Yi Mo<sup>1</sup>, Ning Ouyang<sup>4</sup>, Beibei Jiang<sup>4</sup>, Guilong Yuan<sup>2,3</sup>, Meijuan Duan<sup>1,2,3,4</sup>\*, Dingyang Yuan<sup>1,2,3</sup>\*, Jun Fang<sup>1</sup>\*

**1** College of Bioscience and Biotechnology, Hunan Agricultural University, Changsha, Hunan, China, **2** State Key Laboratory of Hybrid Rice, Hunan Hybrid Rice Research Center, Changsha, Hunan, China, **3** Hunan Academy of Agricultural Sciences, Changsha, Hunan, China, **4** Long Ping Branch, Graduate School of Hunan University, Changsha, Hunan, China

✉ These authors contributed equally to this work.

\* fangjun1973@hunau.edu.cn (JF); yuandingyang@hhrc.ac.cn (DYY); duanmeijuan@163.com (MD)

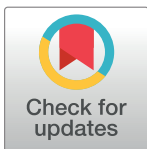

## OPEN ACCESS

**Citation:** Sun Z, Yin X, Ding J, Yu D, Hu M, Sun X, et al. (2017) QTL analysis and dissection of panicle components in rice using advanced backcross populations derived from *Oryza Sativa* cultivars HR1128 and 'Nipponbare'. PLoS ONE 12(4): e0175692. <https://doi.org/10.1371/journal.pone.0175692>

**Editor:** Jauhar Ali, International Rice Research Institute, PHILIPPINES

**Received:** November 30, 2016

**Accepted:** March 29, 2017

**Published:** April 19, 2017

**Copyright:** © 2017 Sun et al. This is an open access article distributed under the terms of the [Creative Commons Attribution License](https://creativecommons.org/licenses/by/4.0/), which permits unrestricted use, distribution, and reproduction in any medium, provided the original author and source are credited.

**Data Availability Statement:** All relevant data are within the paper and its Supporting Information files.

**Funding:** The funders had no role in study design, data collection and analysis, decision to publish, or preparation of the manuscript.

**Competing interests:** The authors have declared that no competing interests exist.

## Abstract

Panicle traits are among the most important agronomic characters which directly relate to yield in rice. Grain number (GN), panicle length (PL), primary branch number (PBN), and secondary branch number (SBN) are the major components of rice panicle structure, and are all controlled by quantitative trait loci (QTLs). In our research, four advanced backcross overlapping populations (BIL152, BIL196a, BIL196b, and BIL196b-156) carrying introgressed segments from chromosome 6 were derived from an *indica/japonica* cross that used the super-hybrid rice restorer line HR1128 and the international sequenced japonica cultivar 'Nipponbare' as the donor and recurrent parents, respectively. The four panicle traits, GN, PL, PBN, and SBN, were evaluated for QTL effects using the inclusive composite interval mapping (ICIM) method in populations over two years at two sites. Results showed that a total of twelve QTLs for GN, PL, PBN, and SBN were detected on chromosome 6. Based on marker loci physical positions, the QTLs were found to be tightly linked to three important chromosomal intervals described as RM7213 to RM19962, RM20000 to RM20210, and RM412 to RM20595. Three QTLs identified in this study, *PL6-5*, *PBN6-1*, and *PBN6-2*, were found to be novel compared with previous studies. A major QTL (*PL6-5*) for panicle length was detected in all four populations at two locations, and its position was narrowed down to a 1.3Mb region on chromosome 6. Near isogenic lines (NILs) carrying *PL6-5* will be developed for fine mapping of the QTL, and our results will provide referable information for gene excavation of panicle components in rice.

## Introduction

In rice, panicle architecture is not only the most important component of plant type, but is also a vital factor for improving grain yield. Grain number (GN), panicle length (PL), primary branch number (PBN), and secondary branch number (SBN) are the major components of rice panicle structure. Many studies have shown that panicle structure and the component traits are all typical and complex quantitative traits which are affected by genes and environment, and that together they determine the design of plant architecture and yield in rice [1–3].

With the development of molecular markers and rice mapping populations, many quantitative trait loci (QTL) for panicle structure components have been reported [4–11] and some have been fine mapped [12–16]. Except the many mapped QTLs for panicle structure, some of those with large effects defined major genes that have been cloned. In 2005, the first gene for grain number, *Gn1a*, was cloned and found to be a major QTL that encodes a cytokinin oxidase gene, and this gave the first indication that endogenous hormone levels could regulate grain yield in rice. Recently, studies of the zinc finger transcription factor *DST* have allowed a further understanding into the formation of spikelet number per panicle, which is regulated through *Gn1a* [17, 18]. The *IPA1* QTL is encoded by *OsSPL14* (SOUAMOS PROMOTER BINDING PROTEIN-LIKE 14) and was found to be regulated by microRNA (miRNA) *OsmiR156 in vivo*. Further research demonstrated that a point mutation in *OsSPL14* disrupts *OsmiR156*-directed regulation of *OsSPL14*, generating an 'ideal' rice plant with reduced tiller number, increased lodging resistance, and enhanced grain yield. In addition, other studies showed that *IPA1* could not only direct binding to the promoter of the negative regulatory factor gene *OsTBI*, thus suppressing tillering in rice, but also affected plant height and panicle length, which impacted yield through positive control of the important plant architecture gene *DEP1* [19–21]. DNA sequence analysis of the aberrant *panicle organization 1* (*apo1*) mutant indicated that the gene encodes an F-box protein which is orthologous to the regulatory factor UFO of class-B genes in *Arabidopsis thaliana*, and showed that *APO1* positively controls spikelet number by suppressing the precocious conversion of the inflorescence [22, 23]. The identification and cloning of a novel rice mutant gene, *short panicle1* (*sp1*), showed that this gene encodes a putative transporter that belongs to the peptide transporter (PTR) family, which supported the previous finding that *SP1* contains a conserved PTR2 domain consisting of 12 transmembrane domains, and that the *SP1*-GFP fusion protein is localized to the plasma membrane [24]. The *lax2* mutant is similar to *lax panicle1* (*lax1*) in that it lacks an apical meristem (AM) in most of the lateral branches of the panicle and has a reduced number of AMs at the vegetative stage. The *lax1 lax2* double mutant synergistically enhances the reduced-branching phenotype, indicating the presence of multiple pathways for branching. *Lax2* encodes a nuclear protein that contains a plant-specific conserved domain and physically interacts with *LAX1* [25, 26].

In this study, four advanced backcross populations derived from an *indica/japonica* cross that used the super-hybrid rice restorer line HR1128 and the international sequenced japonica cultivar 'Nipponbare' as the donor and recurrent parents, respectively, were developed for QTL analysis of rice panicle structure which included the traits GN, PL, PBN, and SBN. We mapped twelve QTLs for panicle components, and among these, three QTLs contained *PL6-5*, *PBN6-1*, and *PBN6-2* were found to be novel. A major QTL (*PL6-5*) for panicle length was detected on the long arm of chromosome 6 and was narrowed down to a physical region of 1.3 Mb. These results will provide referable information for gene excavation of panicle components in rice, and near isogenic lines (NILs) carrying *PL6-5* will then be developed for the fine mapping of panicle length.

## Materials and methods

### Population development

In this study, four advanced backcross populations were selected for QTL mapping of panicle components in rice (Fig 1). The donor parent was an *indica* super-hybrid rice restorer line, HR1128 [27], which was previously chosen to be a high-yield QTL donor for high throughput genetic analysis [28]. The recurrent parent was the *japonica* cultivar ‘Nipponbare’, the first rice cultivar to be genome sequenced [29], which was previously used as a common recurrent parent for population development and multiple QTL analyses [30–32]. Based on previous results, we chose a single plant carrying the target fragment on chromosome 6 to backcross with the recurrent parent continuously. Following this, the BC<sub>3</sub>F<sub>1</sub> plant BIL196, and BIL152, which was heterozygous in this region, were selected for self-pollination, which gave 331 and 200 BC<sub>3</sub>F<sub>2</sub> plants, respectively, as the mapping population. A second population, named BIL196b-156 (BC<sub>3</sub>F<sub>4</sub>, 384 plants), was derived from self-pollination of a BIL196b progeny plant called 156, which carried fewer heterozygous segments on chromosome 6 (Fig 2).

### Field experiments and phenotypic evaluation

The population made up of 331 BC<sub>3</sub>F<sub>2</sub> plants generated from BIL196 was divided into two groups, BIL196a and BIL196b. BIL196a, consisting of 199 BC<sub>3</sub>F<sub>2</sub> plants, was planted at Sanya in Hainan province in the winter of 2014, while BIL196b, consisting of 132 BC<sub>3</sub>F<sub>2</sub> plants, was grown at Changsha in Hunan province in the summer of 2014. Another population consisting of 200 individuals derived from the heterozygous plant BIL152 was cultivated at Sanya adjacent to population BIL196a, while the final population BIL196b-156 was grown at Sanya in Hainan province in the winter of 2015. The donor and recurrent parents were included as controls with three replicates of each. All plant material was cultivated using standard field management practices. A number of panicle characters including grain number (GN), panicle length (PL), primary branch number (PBN), and secondary branch number (SBN) were

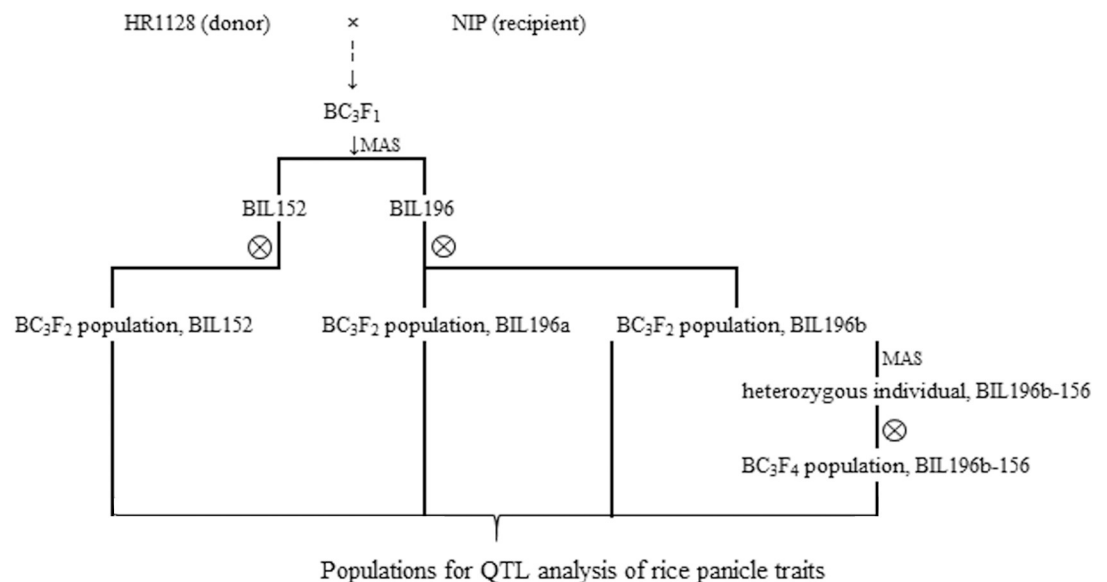

**Fig 1. Flow chart of population development for QTL analysis.**

<https://doi.org/10.1371/journal.pone.0175692.g001>

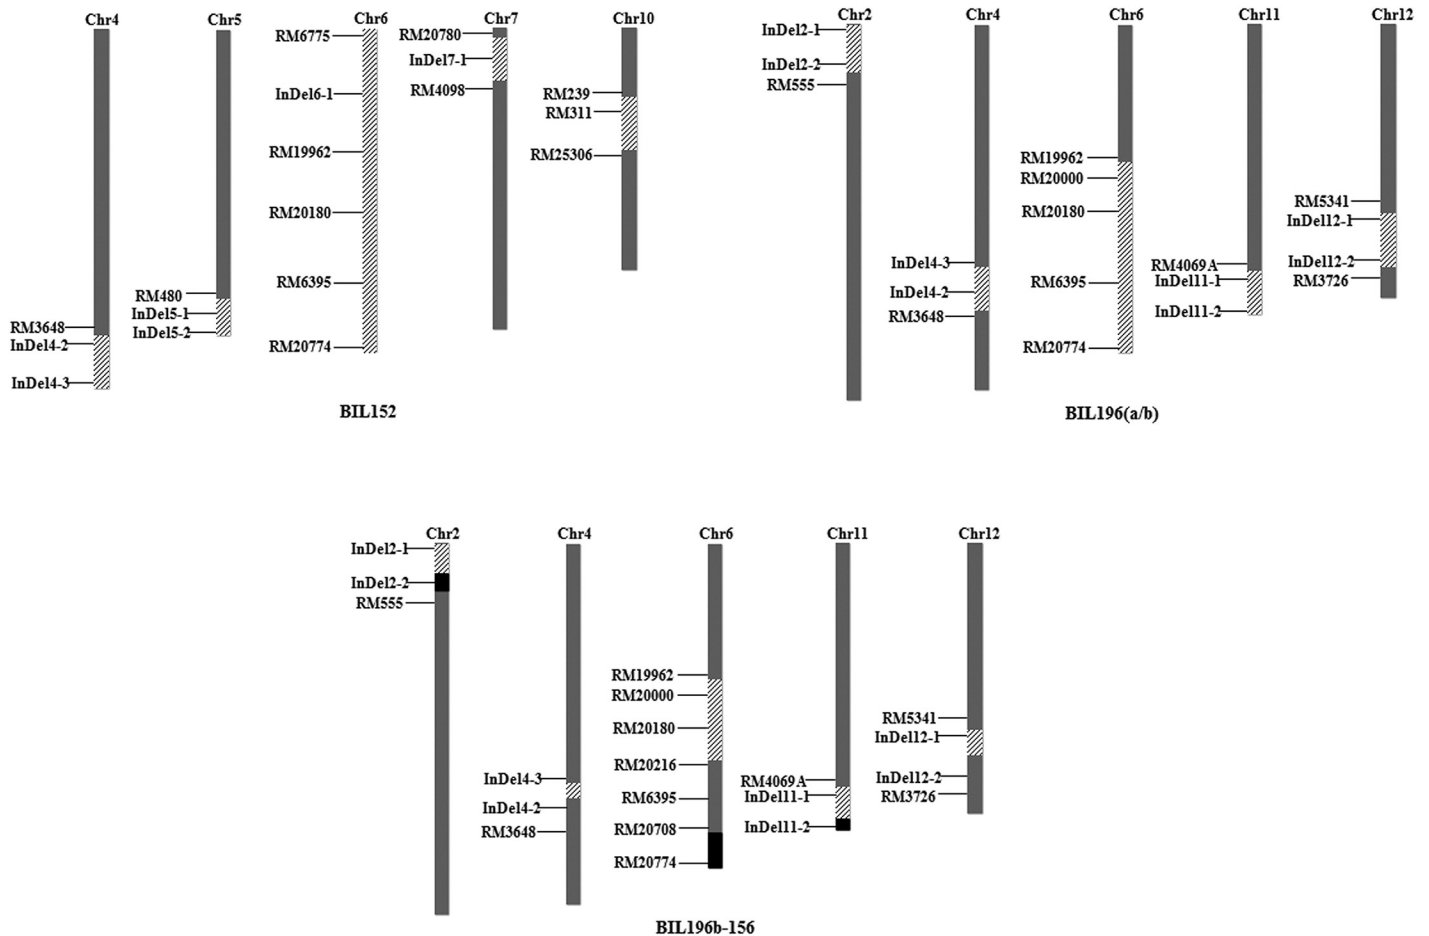

**Fig 2. Graphic genotype of the selected advanced backcross individuals.** The grey and black regions of the chromosomes indicate the homozygous segments from Nipponbare and HR1128 respectively. The hatched regions of the chromosomes indicate the heterozygous areas.

<https://doi.org/10.1371/journal.pone.0175692.g002>

measured in the two parental lines and the four populations. The survey standard was the same as that of Duan et al [28].

### DNA extraction and marker genotyping

Genomic DNA was extracted from small tissue samples from the parental lines and all populations at the seedling stage using the CTAB method [33]. In this study, we used SSR markers which were obtained from the Gramene database (<http://www.gramene.org/>) for linkage map construction and QTL mapping. Marker genotyping and assays were performed using 8% denaturing polyacrylamide gels as described by Wu and Tanksley [34].

### Linkage map construction and QTL analysis

Genetic linkage maps of all populations were constructed with the program Mapmaker/Exp3.0 [35]. QTL analysis was performed using the inclusive composite interval mapping (ICIM) method in IciMapping, version 4.0, based on a stepwise linear regression model [36]. QTL mapping in the present experiment was carried out by calculating the threshold logarithm of odds difference (LOD) for each trait by performing a test with 1,000 permutations. The threshold of LOD values was 2.5. QTL were named according to McCouch et al. [37] and the QTL

mapping results were comprehensively compared to the OGRO database [38], the Q-TARO database [39] and Gramene (<http://archive.gramene.org/ql/>). The statistical significances for the population and parental trait data were calculated with Microsoft Excel. Phenotypic correlation coefficients were calculated using SPSS13.0 software (SPSS Inc., Chicago, IL).

## Results

### Phenotypic data analysis of parental lines and populations

In our research, the four panicle-related traits, grain number (GN), panicle length (PL), primary branch number (PBN), and secondary branch number (SBN), were investigated in four populations (BIL152, BIL196a, BIL196b, and BIL196b-156) and the parental lines at SY (SanYa) in 2014 and CS (ChangSha) in 2015.

Notable differences were observed between the measured traits in Nipponbare and HR1128 (Table 1 and Fig 3A). The male parent HR1128 had higher grain number (maximum GN of 532.6 at CS in 2014) compared with the female parent ‘Nipponbare’ (maximum GN of 119.3 at CS in 2014). A similar situation was observed for the three traits PBN, SBN, and PL. The donor HR1128 exhibited a large panicle architecture with a panicle length of 30.2 cm and highly dense branching (PBN = 31.5 and SBN = 96.7) at CS in 2014, and the tendency was the same in the environment at SY in 2014 and 2015. The female parent ‘Nipponbare’ displayed a typical small panicle type with short panicle length of 17.6 cm, reduced branch numbers (PBN = 8.7 and SBN = 9.8) at SY in 2015, and had the lowest trait values among the different environments. The large trait differences between the two parents provided an abundant source of trait variation for population development and QTL mapping.

The descriptive statistics and frequency distributions of panicle related traits in the BIL (backcross inbred line) populations are presented in Fig 3 and Table 1. A large variation in the BILs was observed for GN, PL, PBN, and SBN in 2014 and 2015. The phenotypic values were all found to be continuous with normal frequency distributions, and the values of population skewness and kurtosis were all <1. Transgressive segregation was also observed for most of the traits which indicated that panicle component traits are controlled by multiple QTLs. Both of the above features of the BIL populations implied that all BILs were suited for QTL mapping of panicle-related traits.

Phenotypic correlation coefficients for BIL152, BIL196a, BIL196b, and BIL196b-156 were calculated and the results are shown in Table 2. All traits were found to be correlative to each

**Table 1. Descriptive statistics and frequency distributions of panicle related traits in populations and parents.**

| Traits | Environment   | BIL152     |             | BIL196a    |             | BIL196b    |             | BIL196b-156 |             | Parents    |        |
|--------|---------------|------------|-------------|------------|-------------|------------|-------------|-------------|-------------|------------|--------|
|        |               | Range      | Mean ± SD   | Range      | Mean ± SD   | Range      | Mean ± SD   | Range       | Mean ± SD   | Nipponbare | HR1128 |
| GN     | Sanya,2014    | 66.0–153.0 | 104.2±15.71 | 74.0–175.0 | 125.2±17.40 |            |             |             |             | 98.1       | 421.9  |
|        | Changsha,2014 |            |             |            |             | 95.0–236.0 | 170.4±31.72 |             |             | 119.3      | 532.6  |
|        | Sanya,2015    |            |             |            |             |            |             | 71.0–221.0  | 125.3±22.79 | 88.9       | 397.1  |
| PL(cm) | Sanya,2014    | 15.9–22.3  | 18.7±1.25   | 17.2–24.5  | 20.1±1.32   |            |             |             |             | 18.0       | 25.1   |
|        | Changsha,2014 |            |             |            |             | 18.6–34.1  | 25.8±2.38   |             |             | 23.8       | 30.2   |
|        | Sanya,2015    |            |             |            |             |            |             | 15.8–24.5   | 20.1±1.37   | 17.6       | 23.8   |
| PBN    | Sanya,2014    | 7.0–13.0   | 10.0±1.16   | 7.0–13.0   | 10.0±1.09   |            |             |             |             | 8.2        | 23.3   |
|        | Changsha,2014 |            |             |            |             | 8.0–17.0   | 12.7±1.50   |             |             | 9.8        | 31.5   |
|        | Sanya,2015    |            |             |            |             |            |             | 6.0–13.0    | 9.6±1.29    | 8.7        | 25.1   |
| SBN    | Sanya,2014    | 6.0–24.0   | 13.4±3.29   | 7.0–27.0   | 17.8±3.40   |            |             |             |             | 10.3       | 77.2   |
|        | Changsha,2014 |            |             |            |             | 9.0–45.0   | 25.9±7.47   |             |             | 14.8       | 96.7   |
|        | Sanya,2015    |            |             |            |             |            |             | 6.0–28.0    | 17.9±3.94   | 9.8        | 71.5   |

<https://doi.org/10.1371/journal.pone.0175692.t001>

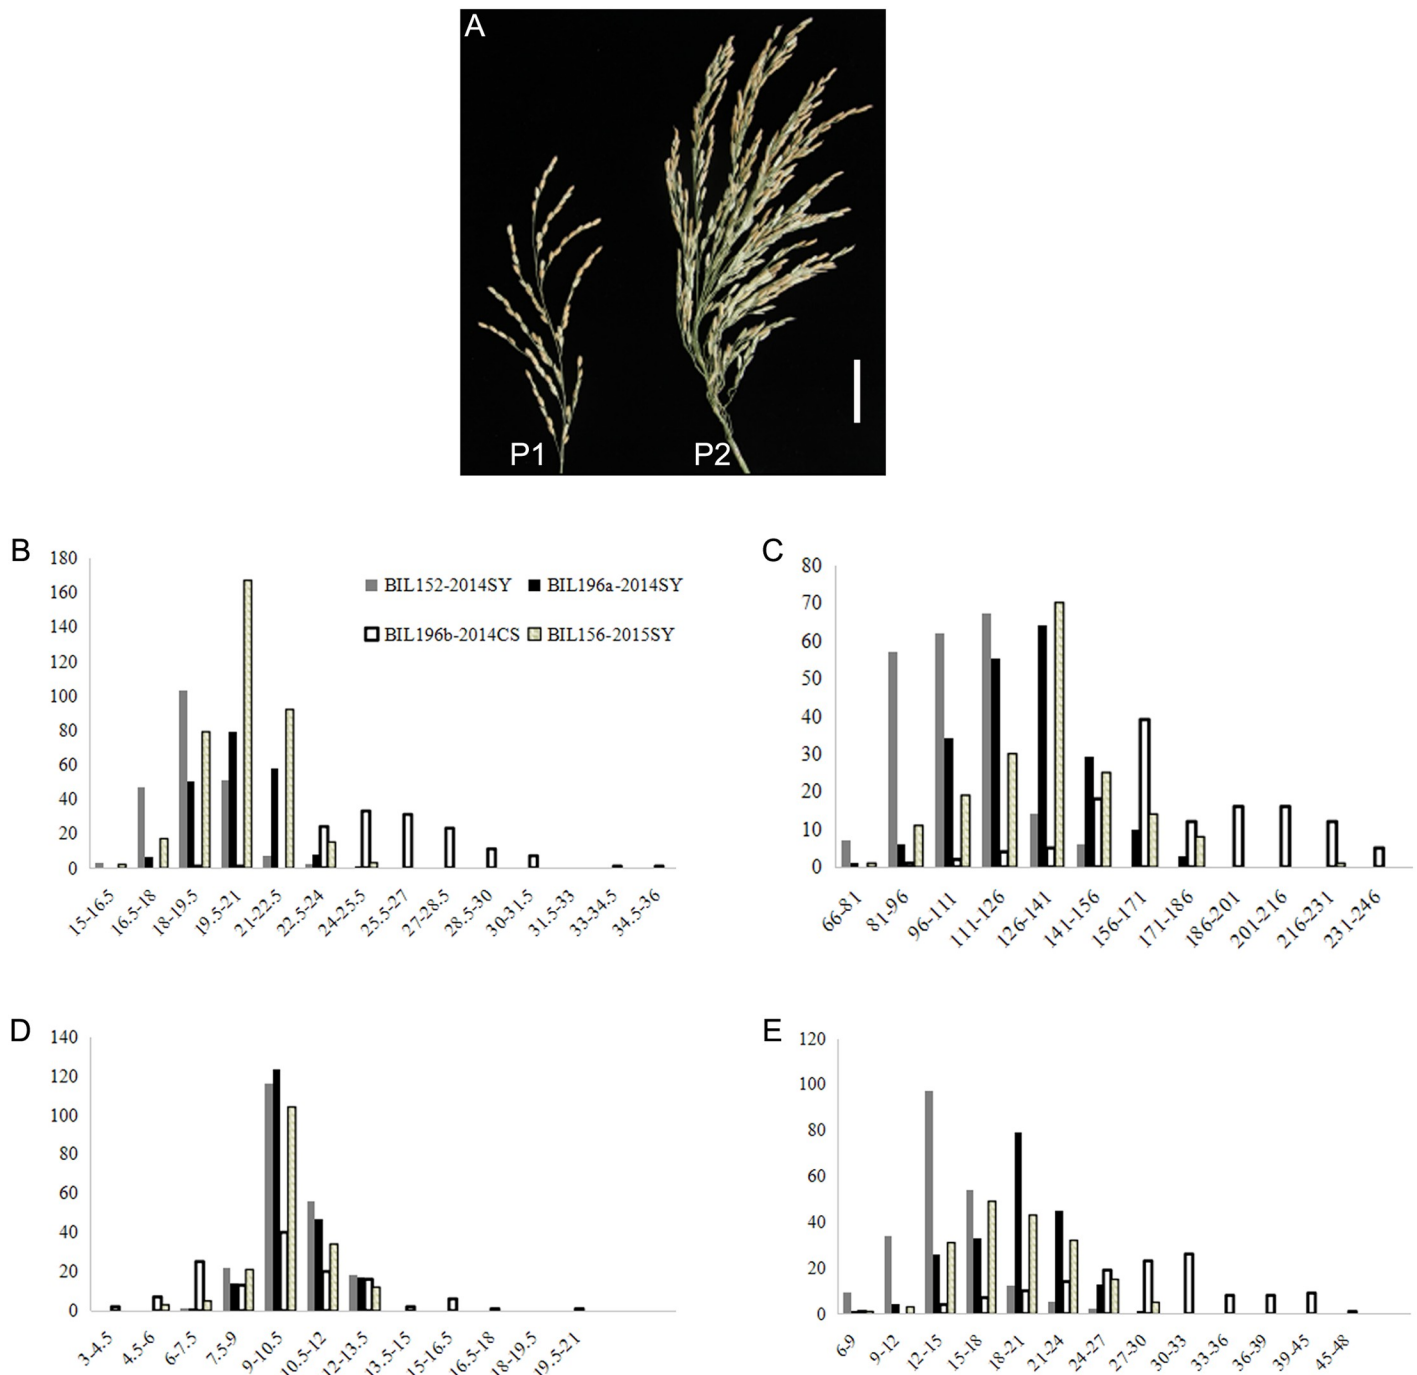

**Fig 3. Field performance comparison between parents and distribution of yield components in the backcross populations.** (A) Panicle shape comparison between R1128 and Nipponbare. The P1 and P2 represent Nipponbare and HR1128 respectively. Scale bar: 5 cm. (B) Panicle length. (C) Grain number per panicle. (D) Primary branch number. (E) Secondary branch number.

<https://doi.org/10.1371/journal.pone.0175692.g003>

other in different populations. For example, striking positive correlations were found between SBN and other panicle traits GN, PL and PBN in the BIL152 population. Similar phenomena were observed in all other populations. It was noteworthy that the correlation coefficients among panicle traits in BIL196b-156 were generally higher than those in other populations.

**Table 2. Correlation coefficients among four panicle traits, GN, PL, PBN and SBN for BIL152 (upper), BIL196a (secondary), BIL196b (tertiary) and BIL196b-156 (lower) populations.**

|     | GN      | PL      | PBN     |
|-----|---------|---------|---------|
| SBN | 0.874** | 0.596** | 0.481** |
|     | 0.918** | 0.692** | 0.538** |
|     | 0.905** | 0.586** | 0.479** |
|     | 0.872** | 0.966** | 0.968** |
| PBN | 0.687** | 0.486** |         |
|     | 0.655** | 0.585** |         |
|     | 0.589** | 0.262** |         |
|     | 0.776** | 0.992** |         |
| PL  | 0.654** |         |         |
|     | 0.748** |         |         |
|     | 0.491** |         |         |
|     | 0.769** |         |         |

\*\* is significant at  $p < 0.01$ .

<https://doi.org/10.1371/journal.pone.0175692.t002>

the biggest and smallest correlation coefficients were all found between the same traits, PL and PBN; their values were 0.992 and 0.262 in BIL196b-156 and BIL196b respectively, and they were all significantly positively correlated at the 0.01 level.

### QTLs for panicle traits in the BILs

Three populations, BIL152, BIL196a, and BIL196b, were used for QTL analysis of panicle-related traits, and the results are shown in Table 3.

In BIL152, four QTLs for GN, PL, PBN, and SBN were detected on chromosome 6 (S1 Fig). QTL *PL6-1* had the highest LOD value (LOD = 5.71) and explained 12.43% of the phenotypic variation for panicle length among the all four genetic regions, and the HR1128 allele had an increase in PL. The other three QTLs, *GN6-1*, *PBN6-1*, and *SBN6-1*, shared the same interval between RM7213 and RM19962 with LOD values of 4.15, 4.70, and 3.07 and explained 11.08%, 12.42%, and 8.04% of phenotypic variations, respectively. The positive alleles of QTLs *GN6-1*, *PBN6-1*, and *SBN6-1* were all from the donor parent HR1128, and the *GN6-1* allele with the biggest additive effect could increase the grain number by 7.09.

**Table 3. QTL analysis of panicle related traits in populations.**

| Population  | Environment   | Trait Name | QTL Name      | Position (cM) | Left Marker | Right Marker | LOD  | PVE (%) | Add   | Dom   |
|-------------|---------------|------------|---------------|---------------|-------------|--------------|------|---------|-------|-------|
| BIL152      | Sanya,2014    | GN         | <i>GN6-1</i>  | 109.00        | RM7213      | RM19962      | 4.15 | 11.08   | -7.09 | -4.04 |
|             |               | PL         | <i>PL6-1</i>  | 121.00        | RM20118     | RM20210      | 5.71 | 12.43   | -0.75 | 0.16  |
|             |               | PBN        | <i>PBN6-1</i> | 106.00        | RM7213      | RM19962      | 4.70 | 12.42   | -0.53 | -0.35 |
|             |               | SBN        | <i>SBN6-1</i> | 110.00        | RM7213      | RM19962      | 3.07 | 8.04    | -1.36 | -0.43 |
| BIL196a     | Sanya,2014    | GN         | <i>GN6-2</i>  | 6.00          | RM20118     | RM20210      | 4.63 | 10.66   | -7.11 | -1.53 |
|             |               | PL         | <i>PL6-2</i>  | 6.00          | RM20118     | RM20210      | 5.98 | 12.69   | -0.60 | -0.08 |
|             |               | PL         | <i>PL6-3</i>  | 65.00         | RM412       | RM20595      | 2.98 | 6.12    | -0.10 | -0.54 |
|             |               | PBN        | <i>PBN6-2</i> | 0.00          | RM20000     | RM6818       | 5.69 | 12.34   | -0.45 | -0.29 |
|             |               | SBN        | <i>SBN6-2</i> | 6.00          | RM20118     | RM20210      | 2.63 | 6.18    | -1.04 | -0.40 |
| BIL196b     | Changsha,2014 | PL         | <i>PL6-4</i>  | 40.00         | RM20210     | RM20018      | 3.06 | 12.67   | -1.22 | 0.40  |
|             |               | SBN        | <i>SBN6-3</i> | 16.00         | RM20000     | RM20210      | 2.77 | 17.18   | -3.20 | -3.95 |
| BIL196b-156 | Sanya,2015    | PL         | <i>PL6-5</i>  | 3.00          | RM20118     | RM003        | 2.54 | 3.10    | -0.26 | -0.31 |

<https://doi.org/10.1371/journal.pone.0175692.t003>

Five QTLs for the four traits GN, PL, PBN, and SBN were identified in the BIL196a population at Shanya in 2014. The three QTLs for traits GN, PL, and SBN, *GN6-2*, *PL6-2*, and *SBN6-2*, were detected in the same chromosomal interval at the same position (S2 Fig). Among these, the QTL *PL6-2* had the highest LOD score (5.98) and explained the largest percentage of phenotypic variation (12.69%), similar to *PL6-1* detected in the BIL152 population at Shanya in 2014. All three QTLs had an increasing effect on their traits, and the positive alleles were from the male parent HR1128 as well. In addition, two other QTLs, *PL6-3* and *PBN6-2*, were also detected in this population in different genomic regions, and they had LOD values of 2.98 and 5.69, respectively. These two QTLs had a positive impact on PL and PBN, explaining 6.12% and 12.34% of the phenotypic variation separately, and the positive alleles came from the same parent, HR1128.

In the BIL196b population, there were only two QTLs for PL and SBN detected at Changsha in 2014 (S3 Fig). *PL6-4* with the higher LOD value (3.06) was mapped to the interval between markers RM20210 and RM20018, and explained 12.67% of the phenotypic variation explanation (PVE) for panicle length. The other QTL, *SBN6-3*, had a smaller LOD score (2.77) and was located between marker loci RM20000 and RM20210, but had larger phenotypic variation ratio (17.18%). It is noteworthy that the two QTLs mapped to nearly the same region on chromosome 6 as determined by the marker loci RM20000 and RM20018, and they both had a positive additive effect, with the positive alleles originating from the donor HR1128.

### Validation of the QTL for panicle length between marker loci RM20118 and RM20210

A segregating population, BIL196b-156, which consisted of 384 individuals, was developed to validate the genetic interval RM20118 to RM20210 for the panicle length QTL. As shown in Table 3 and S4 Fig, the QTL *PL6-5*, with LOD value 2.54 and 3.10% PVE, was detected in this population at Shanya in 2015. The QTL region was from marker loci RM20118 to RM003, which was located between marker loci RM20118 and RM20210. The genetic interval containing *PL6-5* was narrowed down to a physical region of 1.3 Mb on chromosome 6 that was smaller than the range for QTLs *PL6-1*, *PL6-2*, and *PL6-4*. The positive allele of *PL6-5* came from the cultivated variety HR1128 and it had an increasing effect on panicle length.

## Discussion

### QTL detection in advanced backcross overlapping rice populations

Panicle-related traits in rice include GN per panicle, PL, PBN, and SBN. All are typical quantitative traits that are controlled by major and minor genes and influenced by genetic background and the external environment. Because of these confounding factors, it is necessary to detect the QTLs in different environments and genetic backgrounds in order to validate the existence of actual QTLs. Comparison of QTLs detected in advanced backcross and overlapping populations of defined pedigree could improve the reliability of QTL detection [40–43]. In this research, four advanced backcross and overlapping populations (BIL152, BIL196a, BIL196b and BIL196b-156) were developed for the detection of panicle trait QTLs at Changsha and Sanya in 2014 and 2015. For example, the panicle length QTL *PL6-1*, which was detected in population BIL152, and *PL6-2*, which was detected in the BIL196a population, could support the existence and effects of each other, because the population BIL152 contained nearly all the heterozygous segments of chromosome 6 which were partially duplicated compared with BIL196a, and the QTL interval was located in the overlapping region. Another fact may certify the QTL *PL6-1* could be detected in different environments. Populations BIL196a and



BIL196b, two parts of the same segregating population, and BIL196b-156, which was derived from BIL196b, were grown at Sanya, Changsha, and Sanya in 2014, 2014, and 2015 respectively. The data obtained from two regions and three seasons gave strong support to the notion that the panicle length QTLs *PL6-2*, *PL6-4*, and *PL6-5* are the same, and that *PL6-2* had the highest LOD value of 5.98 along with the maximum 12.69% PVE.

### Comparison and analysis of QTLs

Twelve QTLs for the four panicle components GN, PL, PBN, and SBN were detected on chromosome 6 in this study. Based on the QTL physical positions, the QTLs were tightly linked with three chromosomal regions described as RM7213 to RM19962, RM20000 to RM20210, and RM412 to RM20595 (Table 4).

Three QTLs, *GN6-1*, *PBN6-1*, and *SBN6-1*, were mapped to the first interval and they were all from the same population, BIL152, grown at Sanya in 2014. Compared with the results of previous studies, *qSPN-6* [44], *qSPN-6* [45], *gp6* [46], and *qgn6-3* [28] for grain number shared the common regions with *GN6-1* detected in this study. Among the four QTLs, *qSPN-6* and *gp6* had much larger intervals than *GN6-1* with LOD values of 3.0 and 6.7, and explained variance of 15.3% and 7.9%, respectively. The QTL *qgn6-3* mapped to the smallest physical region (0.4 cM), and was detected in our previous research using an F<sub>2</sub> population derived from the same cross between HR1128 and ‘Nipponbare’, and it had a high LOD score (LOD = 15.62) and normal 8.9% PVE compared to *GN6-1*. The other QTL, *qsbn6-2* [28], located in the same region as *SBN6-1* and the *PBN6-1*, was not available from previous research, and it may be a novel QTL for primary branch number. Further studies should be focused on the grain number QTL *GN6-1* in consideration of the indirect verification from previous studies.

Eight QTLs, including *GN6-2*, *PL6-1*, *PL6-2*, *PL6-4*, *PL6-5*, *PBN6-2*, *SBN6-2*, and *SBN6-3*, mapped to the same chromosomal interval between marker loci RM20000 and RM20210. Among these, *GN6-2* was found in the area of *gp6* [46], *SBN6-2* and *SBN6-3* shared the overlapping interval that contained *qsbn6-3* [28], and originated from the same donor, HR1128. *PL6-1*, *PL6-2*, and *PL6-4* were detected in three different populations in two environments, which strongly supported this QTL having a stable genetic effect, and the validation of *PL6-5* provided further proof that all four panicle-length QTLs could be the same, with the highest LOD score of 5.98 and maximum PVE of 12.69%. It is noteworthy that four panicle-length QTLs (*PL6-1*, *PL6-2*, *PL6-4*, and *PL6-5*) and one branch number QTL (*PBN6-2*) were not identified in previous studies, implying that they may be novel.

In the third chromosomal interval between marker loci RM412 and RM20595, only one panicle-length QTL, *PL6-3*, was mapped to this region which contains a previously mapped PL

**Table 4. Comparison and analysis of QTLs for panicle traits in three genetic regions.**

| Genetic regions  | QTLs detected in this study       | Common regions shared with previous studies                                 |
|------------------|-----------------------------------|-----------------------------------------------------------------------------|
| RM7213--RM19962  | <i>GN6-1</i>                      | <i>qSPN-6</i> [44]; <i>qSPN-6</i> [45]; <i>gp6</i> [46]; <i>qgn6-3</i> [28] |
|                  | <i>PBN6-1</i>                     | N/A                                                                         |
|                  | <i>SBN6-1</i>                     | <i>qsbn6-2</i> [28]                                                         |
| RM20000--RM20210 | <i>GN6-2</i>                      | <i>gp6</i> [46]                                                             |
|                  | <i>PL6-1, PL6-2, PL6-4, PL6-5</i> | N/A                                                                         |
|                  | <i>PBN6-2</i>                     | N/A                                                                         |
|                  | <i>SBN6-2, SBN6-3</i>             | <i>qsbn6-3</i> [28]                                                         |
| RM412--RM20595   | <i>PL6-3</i>                      | <i>RM6811</i> [16]                                                          |

<https://doi.org/10.1371/journal.pone.0175692.t004>

QTL linked to the SSR marker RM6811 [16]. In this study, a population consisting of 540 rice accessions were used for association mapping of panicle length. MLM (mixed linear model) analysis showed that SSR marker RM6811 on chromosome 6 was associated with panicle length ( $p < 0.05$ ) in 2011 and 2012. The QTL PVE ranged from 3.96 to 4.51% compared to *PL6-3*, where the PVE was 6.12%.

### QTL detection in the pericentromeric region

Although map-based cloning has been used successfully in the dissection and identification of many complex quantitative traits in rice, several obstacles, such as depression of meiotic recombination in the centromeric region, can make map-based cloning very difficult [47]. The important yield gene *Ghd7* was initially fine mapped between marker loci RM5436 and C39 in the centromeric region on chromosome 7, and severe recombination suppression was observed in the targeted interval which complicated cloning of the gene. To solve this problem, the candidate gene method was used, which resulted in the cloning of *Ghd7* [48]. Some studies have implied that depression of meiotic recombination occurs not only around the centromere, but could also be present in the pericentromeric region. One putative QTL, *qSPP7*, which controls the number of spikelets per panicle, was identified in the pericentromeric region of rice chromosome 7. In order to isolate the QTL, 1,082 plants with extremely small panicles from a BC<sub>3</sub>F<sub>2</sub> population containing 8,400 individuals were further used to fine map the QTL. This showed that *qSPP7* co-segregated with two marker loci, RM5436 and RM5499, that spanned a physical distance of 912.4 kb. Overall, these results suggested that recombination suppression occurs in the region, and that a positional cloning strategy is not feasible for isolating *qSPP7* [49]. A similar phenomenon may have occurred in our study. The panicle length QTLs *PL6-1*, *PL6-2*, and *PL6-4* were initially mapped to the same region between marker loci RM20118 and RM20210, and a larger population, BIL196b-156 (BC<sub>3</sub>F<sub>4</sub>), consisting of 385 individuals, was then used to narrow down the *PL6-5* locus to a physical interval of 1.3 Mb between RM20118 and RM003. We found it strange that the LOD score and PVE in the BIL196b-156 (LOD = 2.54, PVE = 3.1%) were much smaller than in the other three populations. Possible explanations include the occurrence of severe recombination suppression in the BIL196b-156 population, because the RM20118 locus is close to the pericentromeric region of rice chromosome 6 (Fig 4), or that the QTL effect was altered in the different environments under various genetic backgrounds. However, existence of the QTL *PL6-5*, that has a significant effect on panicle length in rice, is supported by the fact that it was detected by QTL analyses in four populations. Strategies such as large-scale NIL (near-isogenic line) and F<sub>2</sub> segregating populations combined with bioinformatics prediction may be required for the isolation and cloning of *PL6-5*.

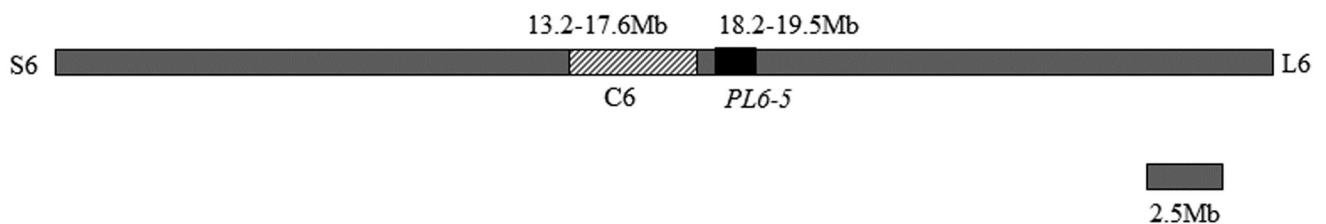

**Fig 4. Map position of QTL *PL6-5* in the pericentromeric region on chromosome 6.** The abbreviations S6 and L6 denote the short arm and long arm region of chromosome 6 respectively. C6 indicates the centromere region from 13.2 Mb to 17.6 Mb. The physical position of QTL *PL6-5* was mapped between 18.2 Mb and 19.5 Mb and this region is close to the centromere, separated by only 600 kb.

<https://doi.org/10.1371/journal.pone.0175692.g004>

## Supporting information

**S1 Fig. Quantitative trait locus analysis of panicle traits using BIL152 individuals.**  
(TIF)

**S2 Fig. Quantitative trait locus analysis of panicle traits using BIL196a individuals.**  
(TIF)

**S3 Fig. Quantitative trait locus analysis of panicle traits using BIL196b individuals.**  
(TIF)

**S4 Fig. Quantitative trait locus analysis of panicle traits using BIL196b-156 individuals.**  
(TIF)

## Acknowledgments

The authors thank Guangjie Yuan and Aichun Hu for their help in field experiments. We also appreciate Prof. Xuguo Zhou, Dr. Bigang Mao and Dr. Donghai Mao for their beneficial suggestions on the manuscript.

## Author Contributions

**Conceptualization:** DYY MD JF.

**Formal analysis:** ZS.

**Funding acquisition:** DYY MD JF.

**Investigation:** ZS XY JD DY MH X. Sun YT X. Sheng LL YM NO BJ GY.

**Project administration:** DYY MD JF.

**Supervision:** DYY MD JF.

**Visualization:** ZS JD.

**Writing – original draft:** ZS.

**Writing – review & editing:** ZS MD JF DYY.

## References

1. Xing Y, & Zhang Q. Genetic and molecular bases of rice yield. *Annu Rev Plant Biol.* 2010; 61: 421–42. <https://doi.org/10.1146/annurev-arplant-042809-112209> PMID: 20192739
2. Kobayasi K, Horie Y, & Imaki T. Relationship between apical dome diameter at panicle initiation and the size of panicle components in rice grown under different nitrogen conditions during the vegetative stage. *Plant Prod Sci.* 2002; 5: 3–7.
3. Cheng FM, Zhang GP, Zhang QF, Zhu HJ, Zhao NC, & Wang F, et al. The difference in amylose content within a panicle as affected by the panicle morphology of rice cultivars. *J Cereal Sci.* 2007; 46: 49–57.
4. Redoña ED, & Mackill DJ. Quantitative trait locus analysis for rice panicle and grain characteristics. *Theor Appl Genet.* 1998; 96: 957–963.
5. Hittalmani S, Huang N, Courtois B, Venuprasad R, Shashidhar HE, & Zhuang JY, et al. Identification of qtl for growth- and grain yield-related traits in rice across nine locations of asia. *Theor Appl Genet.* 2003; 107: 679–90. <https://doi.org/10.1007/s00122-003-1269-1> PMID: 12920521
6. Septiningsih EM, Trijatmiko KR, Moeljopawiro S, & Mccouch SR. Identification of quantitative trait loci for yield and yield components in an advanced backcross population derived from the oryza sativa variety ir64 and the wild relative o. rufipogon. *Theor Appl Genet.* 2003; 107: 1419–1432. <https://doi.org/10.1007/s00122-003-1373-2> PMID: 14513215

7. Thomson MJ, Tai TA, Lai XH, Hinga ME, Lobos KB, & Xu Y. Mapping quantitative trait loci for yield, yield components and morphological traits in an advanced backcross population between *oryza rufipogon* and *oryza sativa* cultivar *jefferson*. *Theor Appl Genet.* 2003; 107: 479–93. <https://doi.org/10.1007/s00122-003-1270-8> PMID: 12736777
8. Yamagishi J, Miyamoto N, Hirotsu S, Laza RC, & Nemoto K. Qtls for branching, floret formation, and pre-flowering floret abortion of rice panicle in a temperate japonica×tropical japonica, cross. *Theor Appl Genet.* 2004; 109: 1555–61. <https://doi.org/10.1007/s00122-004-1795-5> PMID: 15365628
9. Zhang Y, Luo L, Xu C, Zhang Q, & Xing Y. Quantitative trait loci for panicle size, heading date and plant height co-segregating in trait-performance derived near-isogenic lines of rice (*oryza sativa*). *Theor Appl Genet.* 2006; 113: 361–8. <https://doi.org/10.1007/s00122-006-0305-3> PMID: 16791702
10. Ando T, Yamamoto T, Shimizu T, Ma XF, Shomura A, & Takeuchi Y, et al. Genetic dissection and pyramiding of quantitative traits for panicle architecture by using chromosomal segment substitution lines in rice. *Theor Appl Genet.* 2008; 116: 881–890. <https://doi.org/10.1007/s00122-008-0722-6> PMID: 18274726
11. Tian Y, Zhang H, Xu P, Chen X, Liao Y, & Han B, et al. Genetic mapping of a qtl controlling leaf width and grain number in rice. *Euphytica.* 2014; 202: 1–11.
12. Bai X, Wu B, & Xing Y. Yield-related qtls and their applications in rice genetic improvement. *J Integr Plant Biol.* 2012; 54: 300–11. <https://doi.org/10.1111/j.1744-7909.2012.01117.x> PMID: 22463712
13. Kim DM, Lee HS, Kwon SJ, Fabreag ME, Kang JW, & Yun YT, et al. High-density mapping of quantitative trait loci for grain-weight and spikelet number in rice. *Rice.* 2014; 7: 1–11.
14. Peng Y, Gao Z, Zhang B, Liu C, Xu J, & Ruan B, et al. Fine mapping and candidate gene analysis of a major qtl for panicle structure in rice. *Plant Cell Rep.* 2014; 33: 1843–50. <https://doi.org/10.1007/s00299-014-1661-0> PMID: 25079308
15. Zhang L, Wang J, Wang J, Wang L, Ma B, & Zeng L, et al. Quantitative trait locus analysis and fine mapping of the *qpl6* locus for panicle length in rice. *Theor Appl Genet.* 2015; 128: 1151–61. <https://doi.org/10.1007/s00122-015-2496-y> PMID: 25821195
16. Liu E, Liu Y, Wu G, Zeng S, Thi TGT, & Liang L, et al. Identification of a candidate gene for panicle length in rice (*oryza sativa*.) via association and linkage analysis. *Front Plant Sci.* 2016; 7: 1–13.
17. Ashikari M, Sakakibara H, Lin S, Yamamoto T, Takashi T, Nishimura A, Angeles E R, Qian Q, Kitano H, Matsuoka M. Cytokinin oxidase regulates rice grain production. *Science.* 2005; 309:741–745. <https://doi.org/10.1126/science.1113373> PMID: 15976269
18. Li S, Zhao B, Yuan D, Duan M, Qian Q, & Tang L, et al. Rice zinc finger protein *dst* enhances grain production through controlling *gn1a/osckx2* expression. *P Natl Acad Sci USA.* 2013; 110: 3167–72.
19. Jiao Y, Wang Y, Xue D, Jing W, Yan M, & Liu G, et al. Regulation of *osspl14* by *osmir156* defines ideal plant architecture in rice. *Nat Genet.* 2010; 42: 541–544. <https://doi.org/10.1038/ng.591> PMID: 20495565
20. Miura K, Ikeda M, Matsubara A, Song XJ, Ito M, & Asano K, et al. *Osspl14* promotes panicle branching and higher grain productivity in rice. *Nat Genet.* 2010; 42: 545–9. <https://doi.org/10.1038/ng.592> PMID: 20495564
21. Lu Z, Yu H, Xiong G, Wang J, Jiao Y, & Liu G, et al. Genome-wide binding analysis of the transcription activator ideal plant architecture1 reveals a complex network regulating rice plant architecture. *Plant Cell.* 2013; 25: 3743–59. <https://doi.org/10.1105/tpc.113.113639> PMID: 24170127
22. Ikeda K, Ito M, Nagasawa N, Kyozyuka J, Nagato Y. Rice *aberrant panicle organization 1*, encoding an f-box protein, regulates meristem fate. *Plant J.* 2007; 51:1030–1040. <https://doi.org/10.1111/j.1365-313X.2007.03200.x> PMID: 17666027
23. Terao T, Nagata K, Morino K, & Hirose T. A gene controlling the number of primary rachis branches also controls the vascular bundle formation and hence is responsible to increase the harvest index and grain yield in rice. *Theor Appl Genet.* 2010; 120: 875–93. <https://doi.org/10.1007/s00122-009-1218-8> PMID: 20151298
24. Li S, Qian Q, Fu Z, Zeng D, Meng X, & Kyozyuka J, et al. *Short panicle1* encodes a putative ptr family transporter and determines rice panicle size. *Plant J.* 2009; 58: 592–605. <https://doi.org/10.1111/j.1365-313X.2009.03799.x> PMID: 19154200
25. Tabuchi H, & Sato Y. *Lax panicle2* of rice encodes a novel nuclear protein and regulates the formation of axillary meristems. *Plant Cell.* 2011; 23: 3276–87. <https://doi.org/10.1105/tpc.111.088765> PMID: 21963665
26. Mai K, Maekawa M, Shimamoto K, & Kyozyuka J. The *lax1* and *frizzy panicle 2* genes determine the inflorescence architecture of rice by controlling rachis-branch and spikelet development. *Dev Biol.* 2001; 231: 364–73. <https://doi.org/10.1006/dbio.2000.9988> PMID: 11237465
27. Liu H, Deng ZQ, Deng LF, & Deng XL. Breeding and application of new strong heterosis hybrid rice combination liangyou 1128. *Hybrid Rice.* 2012; 27: 17–19.

28. Duan M, Sun Z, Shu L, Tan Y, Dong Y, & Sun X, et al. Genetic analysis of an elite super-hybrid rice parent using high-density snp markers. *Rice*. 2013; 6: 1–15.
29. Goff S A, Darrell R, Tien-Hung L, Gernot P, Ronglin W, & Molly D, et al. A draft sequence of the rice genome (*oryza sativa* l. ssp. japonica). *Science*. 2002; 296: 92–100. <https://doi.org/10.1126/science.1068275> PMID: 11935018
30. Li S, Yan S, Wang AH, Zou G, Huang X, & Han B, et al. Identification of qtls associated with tissue culture response through sequencing-based genotyping of rils derived from 93–11 × nipponbare in rice (*oryza sativa*). *Plant Cell Rep*. 2013; 32: 103–16. <https://doi.org/10.1007/s00299-012-1345-6> PMID: 23064615
31. Zhang H, Zhao Q, Sun ZZ, Zhang CQ, Qi F, & Tang SZ, et al. Development and high-throughput genotyping of substitution lines carrying the chromosome segments of indica 9311 in the background of japonica nipponbare. *J Genet Genomics*. 2011; 38: 603–611. <https://doi.org/10.1016/j.jgg.2011.11.004> PMID: 22196403
32. Zhang H, Zhang CQ, Sun ZZ, Yu W, Gu MH, & Liu QQ, et al. A major locus *qs12*, located in a duplicated segment of chromosome 12, causes spikelet sterility in an indica-japonica rice hybrid. *Theor Appl Genet*. 2011; 123: 1247–56. <https://doi.org/10.1007/s00122-011-1663-z> PMID: 21792631
33. Murray MG, & Wf T. Rapid isolation of high molecular weight plant dna. *Nucleic Acids Research*. 1980; 8: 4321–5. PMID: 7433111
34. Wu KS, & Tanksley SD. Pfg analysis of the rice genome: estimation of fragment sizes, organization of repetitive sequences and relationships between genetic and physical distances. *Plant Mol Biol*. 1993; 23: 243–54. PMID: 8106011
35. Lincoln SE, Daly MJ, & Lander ES. Constructing genetic maps with mapmaker/exp3.0. 1992
36. Wang J. QTL IciMapping: Integrated Software for Building Linkage Maps and Mapping Quantitative Trait Genes. International Plant and Animal Genome Conference XXI. 2013
37. Mccouch SR, Chen X, Panaud O, Temnykh S, Xu Y, & Yong GC, et al. Microsatellite marker development, mapping and applications in rice genetics and breeding. *Plant Mol Biol*. 1997; 35: 89–99. PMID: 9291963
38. Yamamoto E, Yonemaru JI, Yamamoto T, & Yano M. Ogro: the overview of functionally characterized genes in rice online database. *Rice*. 2012; 5: 2820–2833.
39. Yonemaru JI, Yamamoto T, Fukuoka S, Uga Y, Hori K, & Yano M. Q-taro: qtl annotation rice online database. *Rice*. 2010; 3: 194–203.
40. Du JH, Fan YY, Wu JR, & Zhuang JY. Dissection of qtls for yield traits on the short arm of rice chromosome 6. *Agr Sci China*. 2008; 7: 513–520.
41. Blanc G, Charcosset A, Mangin B, Gallais A, & Moreau L. Connected populations for detecting quantitative trait loci and testing for epistasis: an application in maize. *Theor Appl Genet*. 2006; 113: 206–24. <https://doi.org/10.1007/s00122-006-0287-1> PMID: 16791688
42. Robin S, Pathan MS, Courtois B, Lafitte R, Carandang S, & Lanceras S, et al. Mapping osmotic adjustment in an advanced back-cross inbred population of rice. *Theor Appl Genet*. 2003; 107: 1288–96. <https://doi.org/10.1007/s00122-003-1360-7> PMID: 12920518
43. Wu JL, Sinha PK, Variar M, Zheng KL, Leach JE, & Courtois B, et al. Association between molecular markers and blast resistance in an advanced backcross population of rice. *Theor Appl Genet*. 2003; 108: 1024–32. <https://doi.org/10.1007/s00122-003-1528-1> PMID: 15067388
44. Li JZ, Ping HE, Zheng XW, Lu RL, & Zhu LH. Identification and interaction analysis of six agronomic trait loci of rice based on a recombinant inbred population. *Acta Botanica Sinica*. 1999; 41: 1199–1203.
45. He P, Li JZ, Zheng XW, Shen LS, Lu CF, & Chen Y, et al. Comparison of molecular linkage maps and agronomic trait loci between dh and ril populations derived from the same rice cross. *Crop Sci*. 2001; 41: 1240–1246.
46. Hua JP, Xing YZ, Xu CG, Sun XL, Yu SB, & Zhang Q. Genetic dissection of an elite rice hybrid revealed that heterozygotes are not always advantageous for performance. *Genetics*. 2002; 162: 1885–95. PMID: 12524357
47. Haupt W, Fischer T C, Winderl S, Fransz P, Torres-Ruiz RA. The centromere1 (*cen1*) region of *Arabidopsis thaliana*: architecture and functional impact of chromatin. *Plant J*. 2001; 27:285–296. PMID: 11532174
48. Xue W, Xing Y, Weng X, Zhao Y, Tang W, & Wang L, et al. Natural variation in *ghd7* is an important regulator of heading date and yield potential in rice. *Nat Genet*. 2008; 40: 761–767. <https://doi.org/10.1038/ng.143> PMID: 18454147
49. Xing YZ, Tang WJ, Xue WY, Xu CG, & Zhang Q. Fine mapping of a major quantitative trait loci, *qssp7*, controlling the number of spikelets per panicle as a single mendelian factor in rice. *Theor Appl Genet*. 2008; 116: 789–796. <https://doi.org/10.1007/s00122-008-0711-9> PMID: 18219477
